# Supplementary material for: Strontium peroxide as a potential photocatalyst: rapid degradation of organic and pharmaceutical pollutants
Source: Royal Society of Chemistry journal article supplement (doi:10.1039/d3nj03546h), 2023-01-01
Supplement: d3nj03546h1.pdf [file d3nj03546h1.pdf]

## Supplementary information

### Strontium peroxide as a Potential Photocatalyst: Rapid Degradation of Organic and Pharmaceutical Pollutants

Dhakshnamoorthi Harikaran, Vijayaraghavan R\*

Department of Chemistry, School of Advanced Sciences, Vellore Institute of Technology, Vellore -632 014, India.

\*Corresponding author: [rvijayaraghavan@vit.ac.in](mailto:rvijayaraghavan@vit.ac.in)

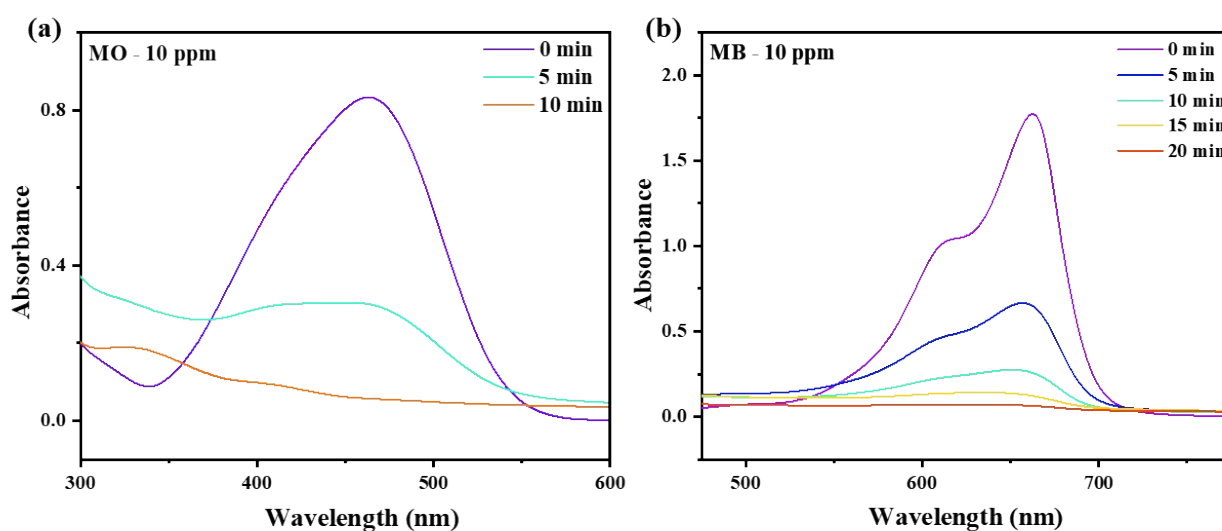

**Fig. S1** (a) Degradation studies of Methyl orange (10 ppm) (b) Methylene blue (10 ppm)

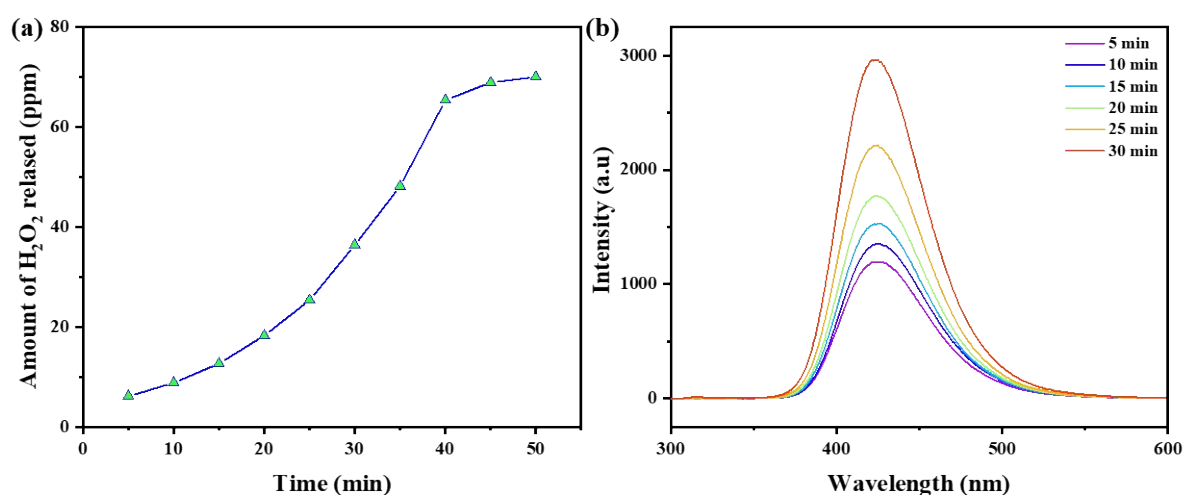

**Fig. S2.**(a) Hydrogen peroxide (H<sub>2</sub>O<sub>2</sub>) (b) hydroxyl radicals (•OH) release profile plot

**Table S1** Comparison of photocatalytic activity by various photocatalysts for the degradation of RhB.

| Photocatalyst                                             | Catalyst Amount (g/L) | RhB concentration (ppm) | Degradation percentage (minutes) | Kinetics (x 10 <sup>-2</sup> min <sup>-1</sup> ) | Ref.      |
|-----------------------------------------------------------|-----------------------|-------------------------|----------------------------------|--------------------------------------------------|-----------|
| SrO <sub>2</sub>                                          | 0.6                   | 10                      | 97 % (15)                        | 24.8                                             | This work |
| 0.1% Ba/ZnO                                               | 0.35                  | 4                       | 98 % (60)                        | 3.6                                              | 1         |
| 5 % Se/ZnO                                                | 0.4                   | 10                      | 98 % (150)                       | -                                                | 2         |
| Ag/ZnO/AgO/TiO <sub>2</sub>                               | 0.3                   | 10                      | 99 % (100)                       | 2.3                                              | 3         |
| g-C <sub>3</sub> N <sub>4</sub> nanosheet                 | 0.8                   | 10                      | 100 % (70)                       | -                                                | 4         |
| h-BN/g-C <sub>3</sub> N <sub>4</sub>                      | 0.5                   | 20                      | 92 % (180)                       | 7.3                                              | 5         |
| LDH@Bi <sub>2</sub> WO <sub>6</sub>                       | 2                     | 10                      | 98 % (90)                        | -                                                | 6         |
| Au/ZnO                                                    | 0.05                  | 10                      | 95 % (180)                       | 2.4                                              | 7         |
| NiO/BiOI                                                  | 0.08                  | 5                       | 96 % (90)                        | 5.7                                              | 8         |
| 2D/2D BiMoO <sub>6</sub> /g-C <sub>3</sub> N <sub>4</sub> | 0.1                   | 5                       | 98 % (40)                        | 8.0                                              | 9         |

|                                                   |     |    |           |     |    |
|---------------------------------------------------|-----|----|-----------|-----|----|
| TiO <sub>2</sub> /W <sub>18</sub> O <sub>49</sub> | 0.6 | 10 | 82 % (60) | 2.6 | 10 |
|---------------------------------------------------|-----|----|-----------|-----|----|

**Table S2** Comparison of various photocatalyst for sun-light degradation of RhB

| <b>Photocatalyst</b>                                                                  | <b>Catalyst Amount (g/L)</b> | <b>RhB concentration (ppm)</b> | <b>Degradation percentage (minutes)</b> | <b>Kinetics (x 10<sup>-2</sup> min<sup>-1</sup>)</b> | <b>Ref.</b> |
|---------------------------------------------------------------------------------------|------------------------------|--------------------------------|-----------------------------------------|------------------------------------------------------|-------------|
| SrO <sub>2</sub>                                                                      | 0.6                          | 10                             | 96 % (105)                              | 2.3                                                  | This work   |
| g-C <sub>3</sub> N <sub>4</sub> /Ag@CoWO <sub>4</sub>                                 | 0.1                          | 10                             | 97 % (120)                              | 3                                                    | 11          |
| Fe <sub>3</sub> O <sub>4</sub> /Bi <sub>2</sub> O <sub>2</sub> (OH)(NO <sub>3</sub> ) | 1                            | 10                             | 98 % (120)                              | -                                                    | 12          |
| g-C <sub>3</sub> N <sub>4</sub> /ZrO <sub>2</sub>                                     | 1                            | 10                             | 94 % (90)                               | 2.9                                                  | 13          |
| TiO <sub>2</sub> /Bi <sub>2</sub> O <sub>3</sub> -gC <sub>3</sub> N <sub>4</sub>      | 1                            | 5                              | 99 % (120)                              | 4.0                                                  | 14          |
| α - Bi <sub>2</sub> O <sub>3</sub>                                                    | 0.75                         | 10                             | 79 % (180)                              | 1.3                                                  | 15          |

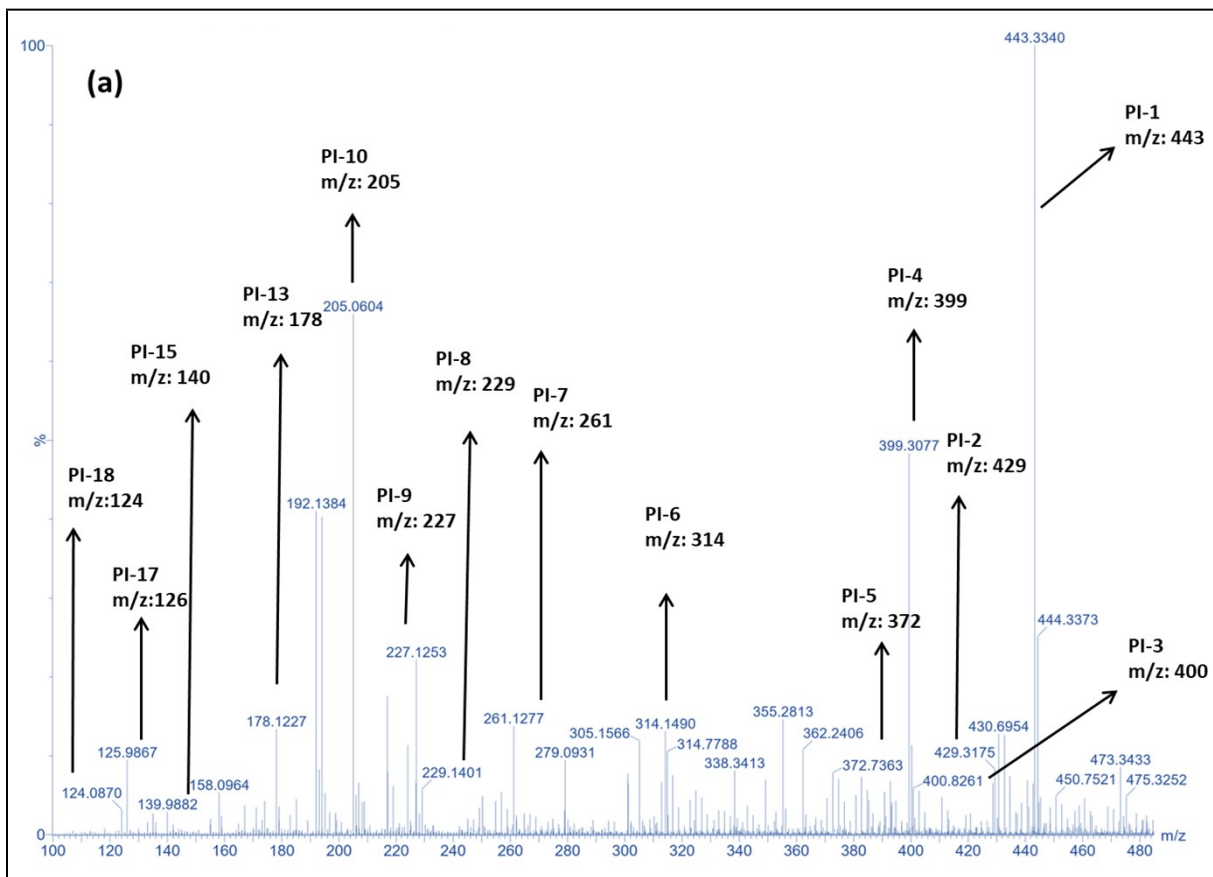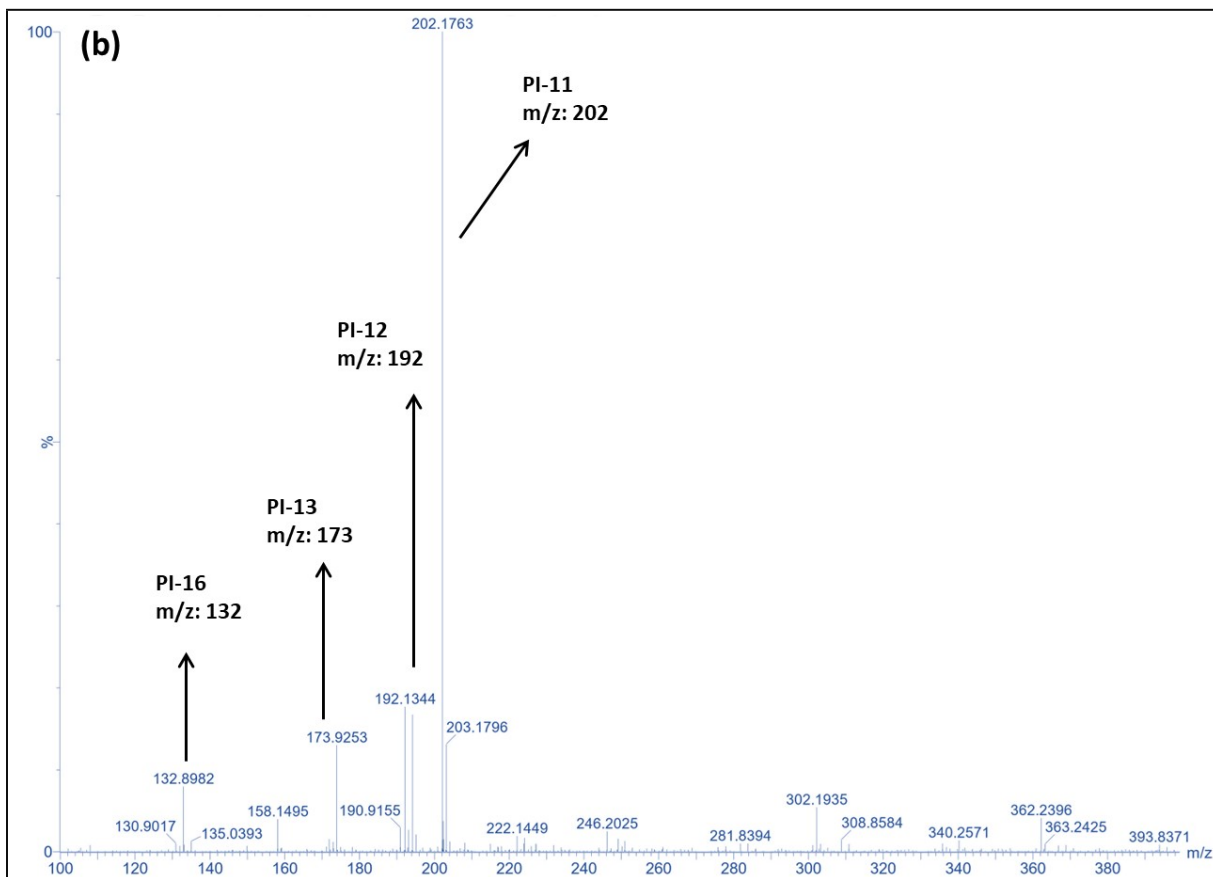

**Fig. S3** (a&b) HR-MS spectra of the photo-intermediates for the RhB degradation

**Table S3** ECOSAR software results for acute and chronic toxicity of RhB and its photo degradation intermediates towards using three aquatic organisms

| PI   | Compound Structure                                                                                                                                                                              | ECOSAR classification          | Acute toxicity (mg/L)    |                             |                                 | Chronic toxicity (mg/L) |         |             |
|------|-------------------------------------------------------------------------------------------------------------------------------------------------------------------------------------------------|--------------------------------|--------------------------|-----------------------------|---------------------------------|-------------------------|---------|-------------|
|      |                                                                                                                                                                                                 |                                | Fish (LC <sub>50</sub> ) | Daphnid (LC <sub>50</sub> ) | Green algae (EC <sub>50</sub> ) | Fish                    | Daphnid | Green algae |
| PI-1 | 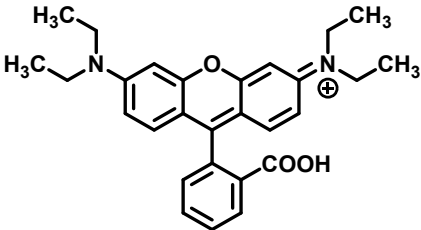 <p>Chemical formula: C<sub>28</sub>H<sub>31</sub>N<sub>2</sub>O<sub>3</sub><sup>+</sup></p> <p>m/z: 443</p>   | Vinal/ allyl/ propargyl ethers | 1090                     | 3550                        | 2720                            | 73.2                    | 353     | 1640        |
| PI-2 |  <p>Chemical formula: C<sub>27</sub>H<sub>29</sub>N<sub>2</sub>O<sub>3</sub><sup>+</sup></p> <p>m/z: 429</p>   | Vinal/ allyl/ propargyl ethers | 1990                     | 7810                        | 6290                            | 153                     | 778     | 3340        |
| PI-3 |  <p>Chemical formula: C<sub>25</sub>H<sub>24</sub>N<sub>2</sub>O<sub>3</sub><sup>+</sup></p> <p>m/z: 400</p> | Vinal/ allyl/ propargyl ethers | 7170                     | 41300                       | 36900                           | 724                     | 41300   | 15000       |
| PI-4 |  <p>Chemical formula: C<sub>27</sub>H<sub>31</sub>N<sub>2</sub>O<sup>+</sup></p> <p>m/z: 399</p>             | Vinal/ allyl/ propargyl ethers | 53.9                     | 148                         | 109                             | 3.20                    | 14.7    | 73.9        |
| PI-5 |  <p>Chemical</p>                                                                                             | Aliphatic amines               | 0.539                    | 0.094                       | 0.037                           | 0.010                   | 0.011   | 0.016       |

---

formula: C<sub>25</sub>H<sub>28</sub>N<sub>2</sub>O

m/z: 372

---

|      |          |      |      |      |      |      |       |
|------|----------|------|------|------|------|------|-------|
| PI-6 | Anilines | 14.7 | 10.5 | 8.92 | 1.89 | 1.95 | 0.274 |
|------|----------|------|------|------|------|------|-------|

---

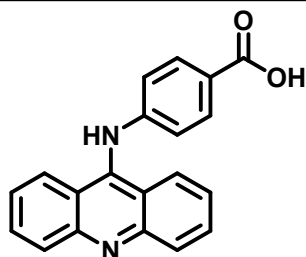

Chemical formula: C<sub>20</sub>H<sub>14</sub>N<sub>2</sub>O<sub>2</sub>

m/z: 314

---

|      |        |      |      |       |       |       |      |
|------|--------|------|------|-------|-------|-------|------|
| PI-7 | Amides | 3.42 | 2.57 | 0.773 | 0.094 | 0.797 | 1.05 |
|------|--------|------|------|-------|-------|-------|------|

---

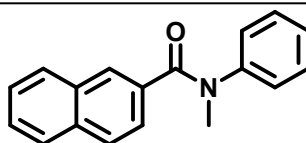

Chemical formula: C<sub>18</sub>H<sub>15</sub>NO

m/z: 261

---

|      |                                 |      |      |      |      |      |      |
|------|---------------------------------|------|------|------|------|------|------|
| PI-8 | Vinyl/ Allyl/ Propargyl ketones | 55.2 | 36.3 | 65.7 | 27.0 | 1.74 | 4.65 |
|------|---------------------------------|------|------|------|------|------|------|

---

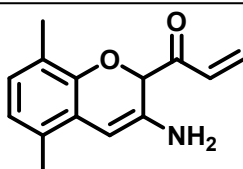

Chemical formula: C<sub>14</sub>H<sub>15</sub>NO<sub>2</sub>

m/z: 229

---

|      |                                 |      |      |      |      |       |      |
|------|---------------------------------|------|------|------|------|-------|------|
| PI-9 | Vinyl/ Allyl/ Propargyl ketones | 22.3 | 14.4 | 20.1 | 5.35 | 0.558 | 2.06 |
|------|---------------------------------|------|------|------|------|-------|------|

---

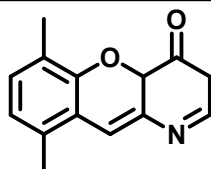

Chemical formula: C<sub>14</sub>N<sub>13</sub>NO<sub>2</sub>

m/z: 227

---

|       |        |      |      |      |       |      |      |
|-------|--------|------|------|------|-------|------|------|
| PI-10 | Amides | 21.5 | 19.3 | 3.19 | 0.357 | 3.90 | 2.59 |
|-------|--------|------|------|------|-------|------|------|

---

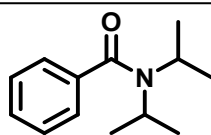

Chemical formula: C<sub>13</sub>H<sub>19</sub>NO

m/z: 205

---

|       |                  |       |       |       |       |       |       |
|-------|------------------|-------|-------|-------|-------|-------|-------|
| PI-11 | Natural organics | 0.026 | 0.021 | 0.081 | 0.004 | 0.006 | 0.051 |
|-------|------------------|-------|-------|-------|-------|-------|-------|

---

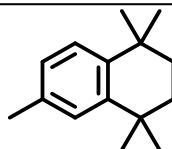

Chemical formula: C<sub>15</sub>H<sub>22</sub>

m/z: 202

---

|       |                                                                                                                                                                                      |                  |       |       |       |       |       |       |
|-------|--------------------------------------------------------------------------------------------------------------------------------------------------------------------------------------|------------------|-------|-------|-------|-------|-------|-------|
| PI-12 | 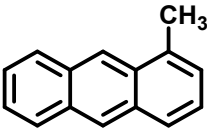 <p>Chemical formula: C<sub>15</sub>H<sub>12</sub></p>                                              | Natural organics | 0.399 | 0.269 | 0.665 | 0.053 | 0.061 | 0.316 |
| PI-13 | <p>m/z: 192</p>  <p>Chemical formula: C<sub>14</sub>H<sub>10</sub></p>                              | Natural organics | 1.15  | 0.809 | 1.47  | 0.145 | 0.144 | 0.625 |
| PI-14 | <p>m/z: 178</p>  <p>Chemical formula: C<sub>12</sub>H<sub>15</sub>N</p>                             | Natural organics | 3.03  | 2.04  | 3.09  | 0.362 | 0.321 | 1.19  |
| PI-15 | <p>m/z: 173</p>  <p>Chemical formula: C<sub>7</sub>H<sub>8</sub>O<sub>3</sub></p>                  | Natural organics | 32300 | 15800 | 6360  | 2650  | 1020  | 1200  |
| PI-16 | <p>m/z: 140</p>  <p>Chemical formula: C<sub>9</sub>H<sub>8</sub>O</p>                             | Natural organics | 21.4  | 13.1  | 13.1  | 2.28  | 1.56  | 4.04  |
| PI-17 | <p>m/z: 132</p>  <p>Chemical formula: C<sub>7</sub>H<sub>10</sub>O<sub>2</sub></p>                | Natural organics | 774   | 445   | 350   | 76.8  | 45.0  | 94.3  |
| PI-18 | <p>m/z: 126</p>  <p>Chemical formula: C<sub>7</sub>H<sub>8</sub>O<sub>2</sub></p> <p>m/z: 124</p> | Natural organics | 1190  | 670   | 485   | 115   | 64.1  | 125   |

Very toxic:  $LC_{50}/EC_{50}/ChV \leq 1$ ;

Toxic:  $10 \geq LC_{50}/EC_{50}/ChV > 1$ ;

Harmful:  $100 \geq LC_{50}/EC_{50}/ChV > 10$ ;

Not harmful:  $LC_{50}/EC_{50}/ChV > 100$ .

**Table S4** Comparison of adsorption studies using various pollutants

| Time | Adsorption of pollutants (%) |     |     |      |
|------|------------------------------|-----|-----|------|
|      | MB                           | MO  | MOX | RhB  |
| 0    | 0                            | 0   | 0   | 0    |
| 30   | 9.1                          | 4.5 | 5.5 | 8.5  |
| 60   | 10.2                         | 4.4 | 6.5 | 9.5  |
| 90   | 10.9                         | 4.6 | 7.0 | 10.3 |
| 120  | 10.9                         | 5.0 | 7.5 | 10.3 |

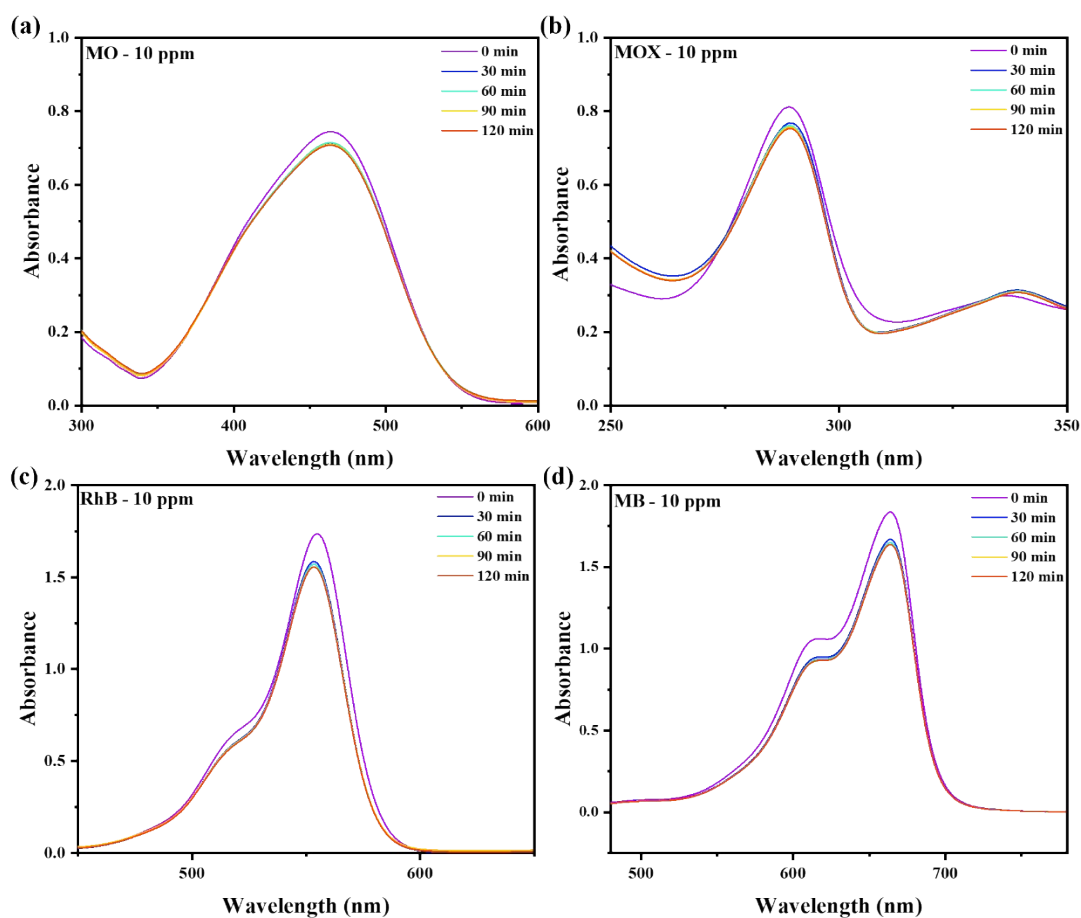



**Fig. S4** Adsorption-desorption studies of (a) methyl orange (b) moxifloxacin (c) rhodamine B and (d) methylene blue

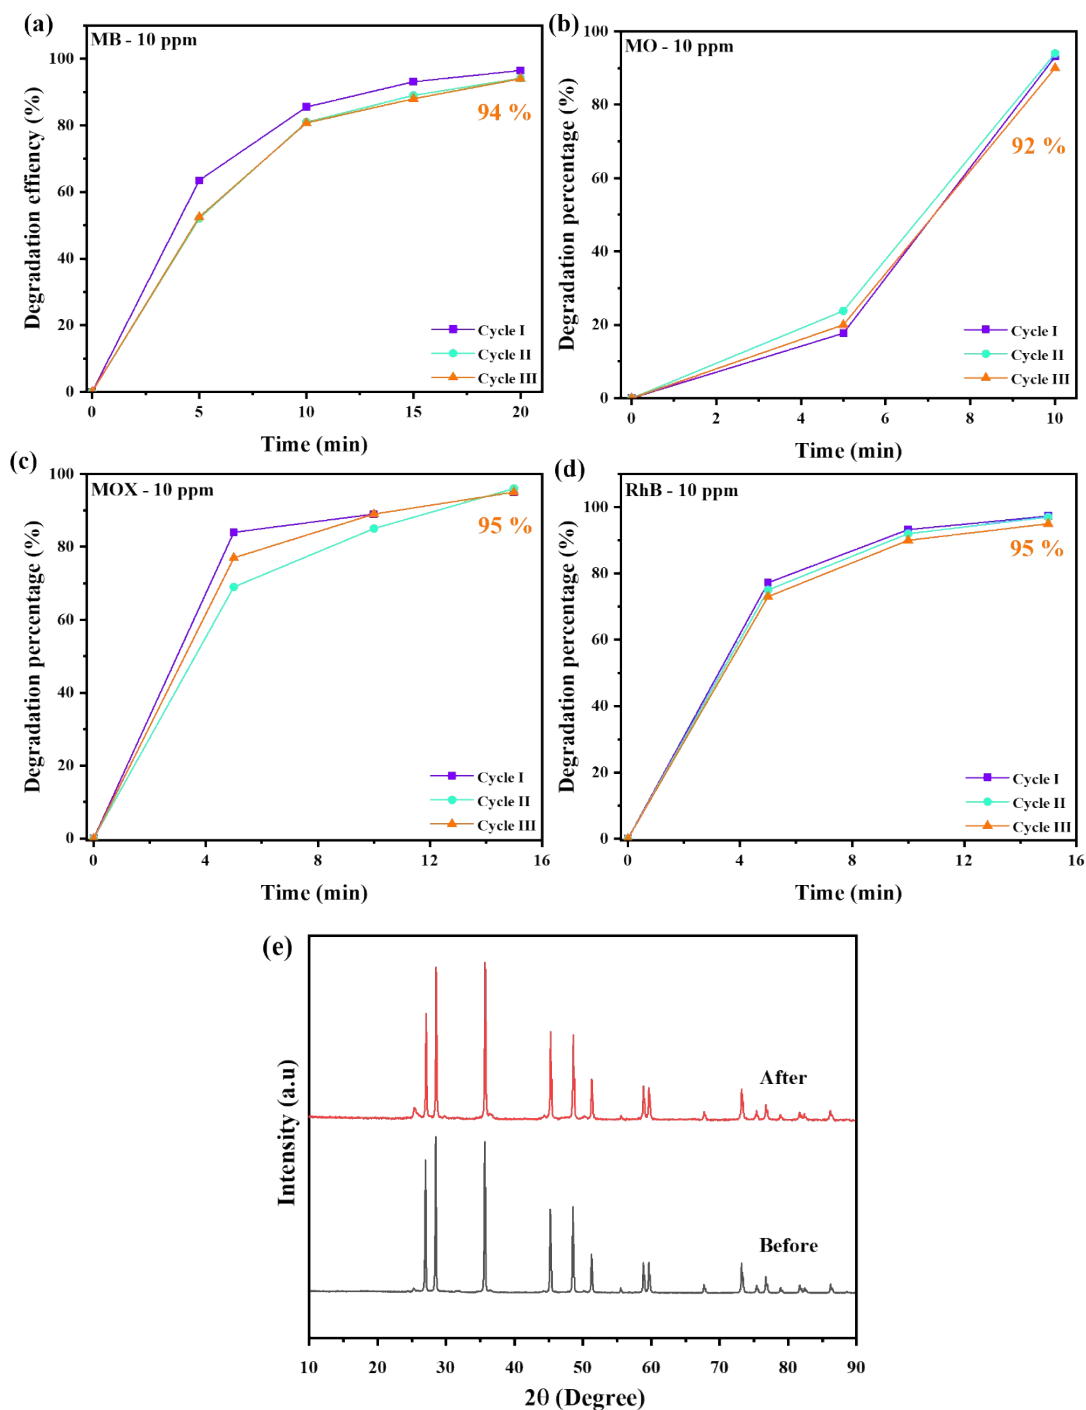

**Fig. S5** Degradation efficiency for recyclability test of (a) methyl orange (b) moxifloxacin (c) rhodamine B and (d) methylene blue and (e) XRD pattern of SrO<sub>2</sub> photocatalyst before and after treatment

## References

- 1 B. Shirdel and M. A. Behnajady, *J. Mol. Liq.*, 2020, **315**, 113633.
- 2 S. Kumar, S. K. Sharma, R. D. Kaushik and L. P. Purohit, *Mater. Today Chem.*, 2021, **20**, 100464.
- 3 H. Bian, Z. Zhang, X. Xu, Y. Gao and T. Wang, *Phys. E Low-Dimensional Syst. Nanostructures*, 2020, **124**, 114236.
- 4 Q. Lin, L. Li, S. Liang, M. Liu, J. Bi and L. Wu, *Appl. Catal. B Environ.*, 2015, **163**, 135–142.
- 5 L. Jiang, X. Yuan, G. Zeng, Z. Wu, J. Liang, X. Chen, L. Leng, H. Wang and H. Wang, *Appl. Catal. B Environ.*, 2018, **221**, 715–725.
- 6 W. E. O. Campos, A. S. C. Lopes, W. R. Monteiro, G. N. R. Filho, F. X. Nobre, P. T. S. Luz, L. A. S. Nascimento, C. E. F. Costa, W. F. Monteiro, M. O. Vieira and J. R. Zamian, *React. Kinet. Mech. Catal.*, 2020, **131**, 505–524.
- 7 M. Ahmad, W. Rehman, M. M. Khan, M. T. Qureshi, A. Gul, S. Haq, R. Ullah, A. Rab and F. Mena, *J. Environ. Chem. Eng.*, 2021, **9**, 104725.
- 8 X. Hu, G. Wang, J. Wang, Z. Hu and Y. Su, *Appl. Surf. Sci.*, 2020, **511**, 145499.
- 9 Q. Li, W. Zhao, Z. Zhai, K. Ren, T. Wang, H. Guan and H. Shi, *J. Mater. Sci. Technol.*, 2020, **56**, 216–226.
- 10 R. Wang, J. Shen, W. Zhang, Q. Liu, M. Zhang, Zulfiqar and H. Tang, *Ceram. Int.*, 2020, **46**, 23–30.
- 11 H. Ashiq, N. Nadeem, A. Mansha, J. Iqbal, M. Yaseen, M. Zahid and I. Shahid, *J. Phys. Chem. Solids*, 2022, **161**, 110437.
- 12 R. Dulyasucharit, S. Wongkasemjit, S. Nanan, O. Intharaksa and C. Masingboon, *J. Solid State Chem.*, 2023, **319**, 123784.
- 13 S. Chand and A. Mondal, *Ceram. Int.*, 2023, **49**, 5419–5430.
- 14 H. xia Jing, Y. lin Gao, L. xiang Li, X. Wang, W. jun Pei and X. feng Yang, *J. Clust. Sci.*, 2023, **34**, 1347–1354.
- 15 G. Gupta, M. Kaur, S. K. Kansal, A. Umar and A. A. Ibrahim, *Ceram. Int.*, 2022, **48**,

29580–29588.
